# Supplementary material for: Dual mTORC1/mTORC2 Inhibition as a Host-Directed Therapeutic Target in Pathologically Distinct Mouse Models of Tuberculosis
Source: PubMed Central journal article supplement (PMC8373221; doi:10.1128/aac.00253-21), 2021-06-17

## **Supplemental Data**

### **Supplemental Methods:** Pharmacokinetics of CC214-2 in mice

**Formulation:** Suspensions of CC214-2 were prepared in aqueous 0.5% carboxymethyl cellulose and 0.25% Tween-80.

**Pharmacokinetic study in mice:** Female B6C3F1 mice were treated with a single oral dose of CC214-2 at 20 or 40 mg/kg (n=4 per dosing group), administered by gavage. Plasma samples were collected at 0.5, 2, 4, 8 and 24 h following administration. Compound concentrations in plasma were determined by LC-MS/MS. Area under the curve (AUC) was calculated by standard non-compartmental methods using Phoenix software (Pharsight). Data are reported in Table S1 as mean of dosing group  $\pm$  standard deviation (SD).

**Table S1. Plasma pharmacokinetic parameters after a single oral dose of CC214-2**

| Parameter                                            | Mean ( $\pm$ SD) parameter value, by dose |               |
|------------------------------------------------------|-------------------------------------------|---------------|
|                                                      | 20 mg/kg                                  | 40 mg/kg      |
| C <sub>max</sub> ( $\mu$ M)                          | 5.4 $\pm$ 1.2                             | 6.6 $\pm$ 2.0 |
| t <sub>max</sub> (h)                                 | 0.5 $\pm$ 0                               | 0.5 $\pm$ 0   |
| AUC <sub>(0-<math>\infty</math>)</sub> ( $\mu$ M·hr) | 14 $\pm$ 3                                | 34 $\pm$ 10   |

**Table S2. Experimental scheme for efficacy evaluation in BALB/c mice**

| Regimen                          | Time point and number of mice to sacrifice |    |    |    |       |        | Total |
|----------------------------------|--------------------------------------------|----|----|----|-------|--------|-------|
|                                  | D-47                                       | D0 | W4 | W8 | W8+12 | W16+12 |       |
| Untreated                        | 4                                          | 6  | 5  | 5  |       |        | 20    |
| Rapamycin <sub>4q3d(M,W,F)</sub> |                                            |    | 5  | 5  |       |        | 10    |
| CC214-2 <sub>30</sub>            |                                            |    | 5  | 5  |       |        | 10    |
| RHZE                             |                                            |    |    | 5  |       | 15     | 20    |
| RHZE+rapamycin                   |                                            |    |    | 5  |       | 15     | 20    |
| RHZE+CC214-2                     |                                            |    |    | 5  |       | 15     | 20    |
| BpaL                             |                                            |    | 5  |    | 15    |        | 20    |
| BPaL+rapamycin                   |                                            |    | 5  |    | 15    |        | 20    |
| BPaL+CC214-2                     |                                            |    | 5  |    | 15    |        | 20    |
| TOTAL                            | 4                                          | 6  | 30 | 30 | 45    | 45     | 160   |

**Table S3. Experimental scheme for efficacy evaluation in C3HeB/FeJ mice**

| Regimen                          | Time point and number of mice to sacrifice |    |    |    |        |        | Total |
|----------------------------------|--------------------------------------------|----|----|----|--------|--------|-------|
|                                  | D-48                                       | D0 | W4 | W8 | W12+12 | W16+12 |       |
| Untreated                        | 4                                          | 8  |    | 8  |        |        | 20    |
| Rapamycin <sub>4q3d(M,W,F)</sub> |                                            |    |    | 8  |        |        | 8     |
| CC214 <sub>30</sub>              |                                            |    |    | 8  |        |        | 8     |
| RHZE                             |                                            |    |    | 8  |        | 20     | 28    |
| RHZE+rapamycin                   |                                            |    |    | 8  |        | 20     | 28    |
| RHZE+CC214-2                     |                                            |    |    | 8  |        | 20     | 28    |
| BpaL                             |                                            |    | 8  |    | 20     |        | 28    |
| BPaL+rapamycin                   |                                            |    | 8  |    | 20     |        | 28    |
| BPaL+CC214-2                     |                                            |    | 8  |    | 20     |        | 28    |
| TOTAL                            | 4                                          | 8  | 24 | 48 | 60     | 60     | 204   |

**Table S4. Efficacy evaluation in BALB/c mice**

| Regimen        | Time point and lung CFU (Mean±SD) |           |           |           | Proportion Relapsing |        |
|----------------|-----------------------------------|-----------|-----------|-----------|----------------------|--------|
|                | D-47                              | D0        | W4        | W8        | W8+12                | W12+12 |
| Untreated      | 1.32±0.15                         | 5.66±0.32 | 5.30±0.31 | 5.57±0.47 |                      |        |
| Rapamycin      |                                   |           | 5.59±0.65 | 8.36±0.33 |                      |        |
| CC214-2        |                                   |           | 5.20±0.45 | 5.09±0.47 |                      |        |
| RHZE           |                                   |           |           | 0.65±0.20 |                      | 9/15   |
| RHZE+rapamycin |                                   |           |           | 0.62±0.39 |                      | 13/14  |
| RHZE+CC214-2   |                                   |           |           | 0.57±0.37 |                      | 7/15   |
| BPaL           |                                   |           | 1.79±0.31 |           | 7/15                 |        |
| BPaL+rapamycin |                                   |           | 1.90±0.36 |           | 15/15                |        |
| BPaL+CC214-2   |                                   |           | 1.74±0.32 |           | 7/15                 |        |

**Table S5. Efficacy evaluation in C3HeB/FeJ mice**

| Regimen        | Time point and lung CFU (Mean±SD) |           |            |           | Proportion Relapsing |        |
|----------------|-----------------------------------|-----------|------------|-----------|----------------------|--------|
|                | D-48                              | D0        | W4         | W8        | W11+12               | W15+12 |
| Untreated      | 1.36±0.06                         | 7.92±1.31 |            | 8.60±0.12 |                      |        |
| Rapamycin      |                                   |           | 9.16±0.18† | 8 Died    |                      |        |
| CC214-2        |                                   |           |            | 8.07±0.70 |                      |        |
| RHZE           |                                   |           |            | 3.41±0.69 |                      | 12/16  |
| RHZE+rapamycin |                                   |           |            | 2.76±0.79 |                      | 10/15  |
| RHZE+CC214-2   |                                   |           |            | 3.32±1.46 |                      | 3/15   |
| BPaL           |                                   |           | 4.67±1.22  |           | 3/15                 |        |
| BPaL+rapamycin |                                   |           | 3.88±1.05  |           | 3/4                  |        |
| BPaL+CC214-2   |                                   |           | 3.84±1.46  |           | 1/12                 |        |

**Fig. S1. Quantitative analysis of histopathology in BALB/c (B) and C3HeB/FeJ (K) mouse lungs.** Quantitative comparisons of the absolute areas of inflammation (A) and necrosis (B), and their respective ratios relative to the total lung surface (C, D) and to each other (E) are presented for BALB/c (B) and C3HeB/FeJ (K) mice. Mice treated with rapamycin (Rapa, R) have red tone symbols and those treated with CC214-2 (CC, C) have blue tone symbols; untreated (UT) mice have black symbols. Lines represent median values.

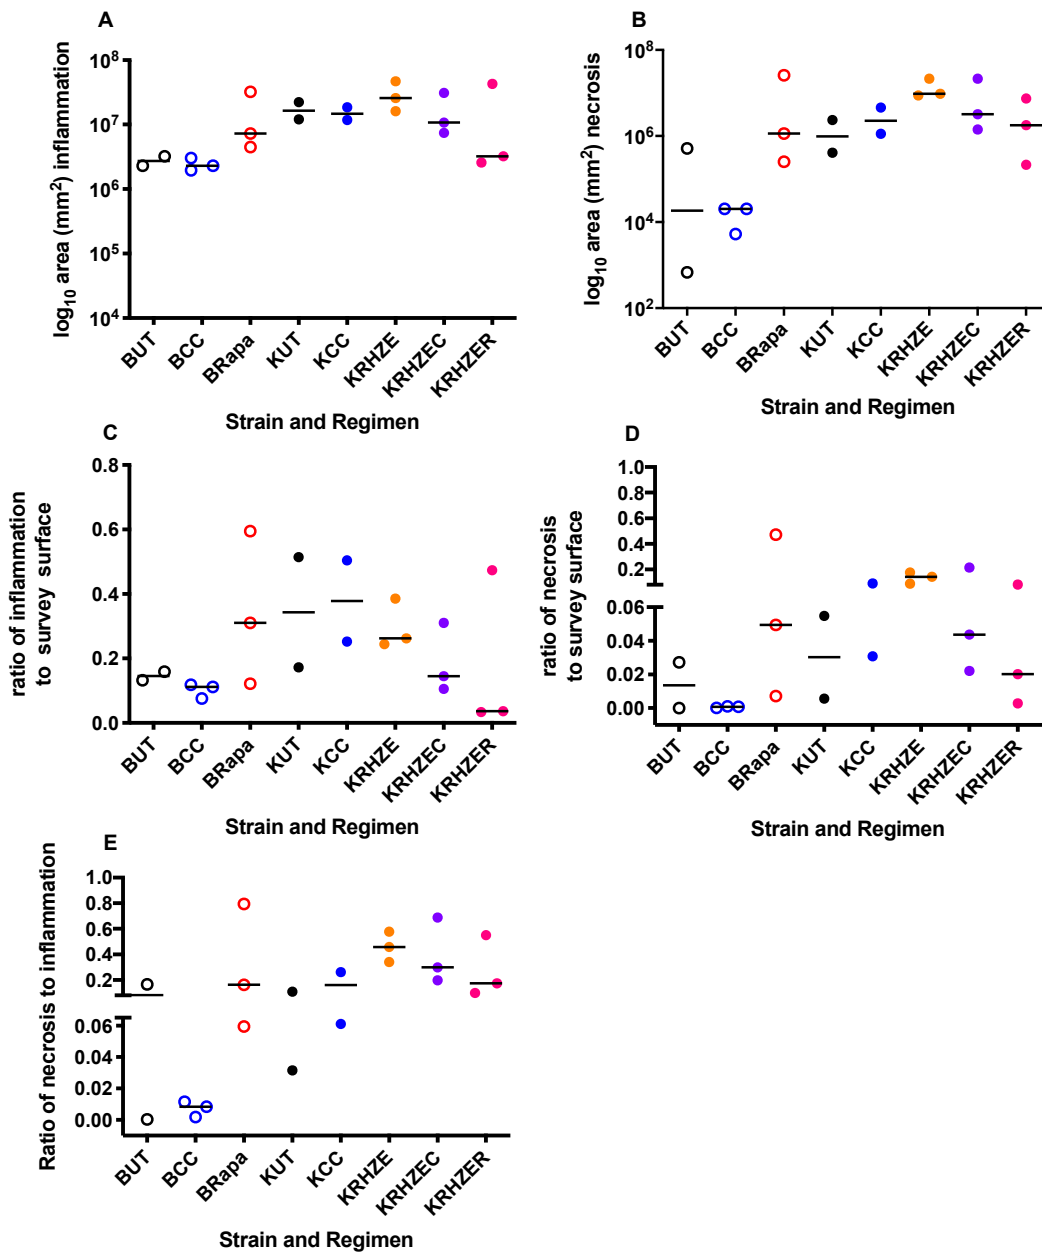

Supplement: aac.00253-21-s0001.pdf [file aac.00253-21-s0001.pdf]
